# Supplementary material for: 2022 American College of Rheumatology/EULAR classification criteria for Takayasu arteritis
Source: HighWire-hosted journal article supplement (doi:10.1136/ard-2022-223482), 2022-11-09
Supplement: ard-2022-223482supp002_data_supplement.pdf [file ard-2022-223482supp002_data_supplement.pdf]

## 2022 AMERICAN COLLEGE OF RHEUMATOLOGY / EUROPEAN ALLIANCE OF ASSOCIATIONS FOR RHEUMATOLOGY

### CLASSIFICATION CRITERIA FOR TAKAYASU'S ARTERITIS

#### CONSIDERATIONS WHEN APPLYING THESE CRITERIA

- These classification criteria should be applied to classify the patient as having Takayasu's arteritis when a diagnosis of medium-vessel or large-vessel vasculitis has been made
- Alternate diagnoses mimicking vasculitis should be excluded prior to applying the criteria

#### ABSOLUTE REQUIREMENTS

Age ≤ 60 years at time of diagnosis

Evidence of vasculitis on imaging<sup>1</sup>

#### ADDITIONAL CLINICAL CRITERIA

|                                                       |    |
|-------------------------------------------------------|----|
| Female sex                                            | +1 |
| Angina or ischemic cardiac pain                       | +2 |
| Arm or leg claudication                               | +2 |
| Vascular bruit <sup>2</sup>                           | +2 |
| Reduced pulse in upper extremity <sup>3</sup>         | +2 |
| Carotid artery abnormality <sup>4</sup>               | +2 |
| Systolic blood pressure difference in arms ≥ 20 mm Hg | +1 |

#### ADDITIONAL IMAGING CRITERIA

|                                                                               |    |
|-------------------------------------------------------------------------------|----|
| Number of affected arterial territories (select one) <sup>5</sup>             |    |
| One arterial territory                                                        | +1 |
| Two arterial territories                                                      | +2 |
| Three or more arterial territories                                            | +3 |
| Symmetric involvement of paired arteries <sup>6</sup>                         | +1 |
| Abdominal aorta involvement with renal or mesenteric involvement <sup>7</sup> | +3 |

**Sum the scores for 10 items, if present. A score of ≥ 5 points is needed for the classification of TAKAYASU'S ARTERITIS.**

1. Evidence of vasculitis in the aorta or branch arteries must be confirmed by vascular imaging (e.g., computed tomographic/catheter-based/magnetic resonance angiography, ultrasound, positron emission tomography).
2. Bruit detected by auscultation of a large artery, including the aorta, carotid, subclavian, axillary, brachial, renal, or iliofemoral arteries.
3. Reduction or absence of pulse by physical examination of the axillary, brachial, or radial arteries.
4. Reduction or absence of pulse of the carotid artery or tenderness of the carotid artery.
5. Number of arterial territories with luminal damage (e.g., stenosis, occlusion, or aneurysm) detected by angiography or ultrasonography from the following nine territories: thoracic aorta, abdominal aorta, mesenteric, left or right carotid, left or right subclavian, left or right renal arteries.
6. Bilateral luminal damage (stenosis, occlusion, or aneurysm) detected by angiography or ultrasonography in any of the following paired vascular territories: carotid, subclavian, or renal arteries.
7. Luminal damage (stenosis, occlusion, aneurysm) detected by angiography or ultrasonography involving the abdominal aorta and either the renal or mesenteric arteries.
